# Supplementary material
Source: Springer Nature journal article supplement (https://www.springermedizin.de/resource/supplementary/12936_2011_1881_MOESM2_ESM.pdf/9542008)
Supplement: MOESM2 [file 9542008]

**534 screen**

**434 febrile women** enrolled  
164(38%) smear positive

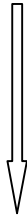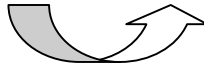

226 (53%) Delivery outside  
the hospital

**208(47%) Hospital deliveries**

- 186 Full term
- 11 pre-term\*
- 8 still births

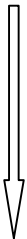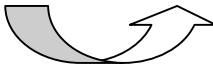

35 Excluded from analysis

- 13 Poor /missing smear/records  
3- Birth before admission  
8 missing tissue  
9 poor tissue taken/preserved

**173 Placental histology results**

- 16 Active acute infections
- 4 Chronic infections
- 16 Past infection

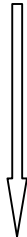

**Post Natal child follow-up**
